# Supplementary material for: CRISPR/Cas9-mediated gene knockout screens and target identification via whole-genome sequencing uncover host genes required for picornavirus infection
Source: PubMed Central journal article supplement (PMC5481571; doi:10.1074/jbc.m117.782425), 2017-04-26
Supplement: 10.1074_M117.782425_jbc.M117.782425-2.pdf [file 10.1074_M117.782425_jbc.M117.782425-2.pdf]

CRISPR/Cas9-mediated Gene-knockout Screens and Target Identification via Whole Genome Sequencing Uncover Host Genes Required for Picornavirus Infection

**Heon Seok Kim, Kyungjin Lee, Sangsu Bae, Jeongbin Park, Chong-Kyo Lee, Meehyein Kim, Eunji Kim, Minju Kim, Seokjoong Kim, Chonsaeng Kim and Jin-Soo Kim**

**Supplementary Figure S1. IGV view of the *PVR* sgRNA target site in the RPV-1 and RPV-2 clones.** The WGS data shows that both clones have mutations at the *PVR* target site: wild-type and mutant sequences are presented. Small indels were verified using IGV. The genomic location is chr19:45,150,636-45,150,704. The PAM sequences are indicated in red, and an insertion is indicated in blue.

**Supplementary Figure S2. IGV view of the *ST3GAL4* sgRNA target site in the R68-1 and R68-2 clones.** The WGS data reveal that both clones have mutations at the *ST3GAL4* target site. The genomic location is chr11:126,277,962-126,278,040. The PAM sequences are indicated in red, and an insertion is indicated in blue.

**Supplementary Figure S3. Sequences of the sites containing sgRNA library-induced mutations in the R68-1 and R68-2 clones.** IGV was used for the analysis. The PAM sequences are indicated in red, and the insertion sequences are indicated in blue. + indicates wild type.

**Supplementary Figure S4. EV-D68-resistant colonies formed after transfection of sgRNAs targeting the *ST3GAL4* gene.**

**Supplementary Figure S5. IGV view of the genes that were knocked-out in clones R68-3, 4, 5, and R68-6.** R68-3; *MGAT5*, chr2:135,012,121-135,012,263. R68-4, 5; *COG1*, chr17:71,189,364-71,189,404. R68-6; *COG5*, chr7:107,204,316-107,204,356. The PAM sequences are indicated in red, and the insertion sequences are indicated in blue.

**Supplementary Figure S6. Sequences of the sites containing sgRNA library-induced mutations in the R68-3, 4, 5, and R68-6 clones.** IGV was used for the analysis. The PAM sequences are indicated in red, and the insertion sequences are indicated in blue. + indicates wild type.

**Supplementary Table S1. List of sgRNA sequence**

**Supplementary Table S2. Sequence of RPV-1, 2 clones**

**Supplementary Figure S1. IGV view of the *PVR* sgRNA target site in the RPV-1 and RPV-2 clones.** The WGS data shows that both clones have mutations at the *PVR* target site: wild-type and mutant sequences are presented. Small indels were verified using IGV. The genomic location is chr19:45,150,636-45,150,704. The PAM sequences are indicated in red, and an insertion is indicated in blue.

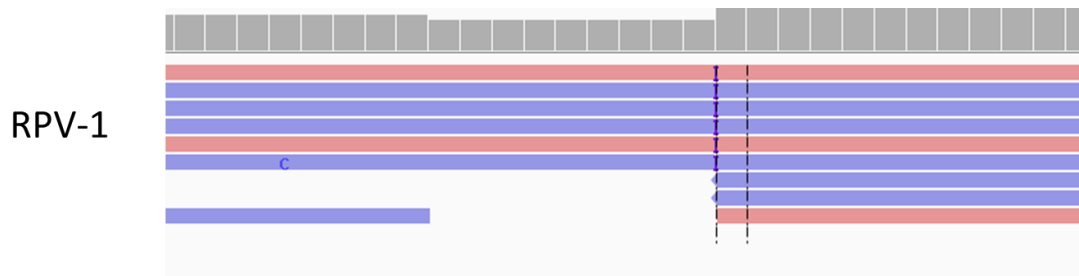

hg19 CACCAAACGCAGGG**CCC**CAG-CTATTCGGAGTCCAAACGGCTGGA  
 1 CACCAAACGCAGGG**CCC**CAG**T**CTATTCGGAGTCCAAACGGCTGGA

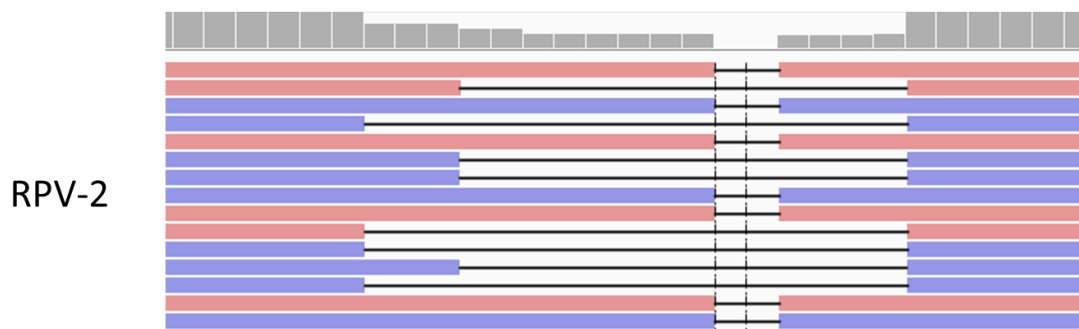

hg19 CACCAAACGCAGGG**CCC**CAGCTATTCGGAGTCCAAACGGCTGG  
 1 CACCAAACGCAGGG**CCC**CAG--ATTCGGAGTCCAAACGGCTGG  
 2 CACCAAACGCAGGG-----AGTCCAAACGGCTGG  
 3 CACCAAACG-----GGAGTCCAAACGGCTGG

**Supplementary Figure S2. IGV view of the *ST3GAL4* sgRNA target site in the R68-1 and R68-2 clones.** The WGS data reveal that both clones have mutations at the *ST3GAL4* target site. The genomic location is chr11:126,277,962-126,278,040. The PAM sequences are indicated in red, and an insertion is indicated in blue.

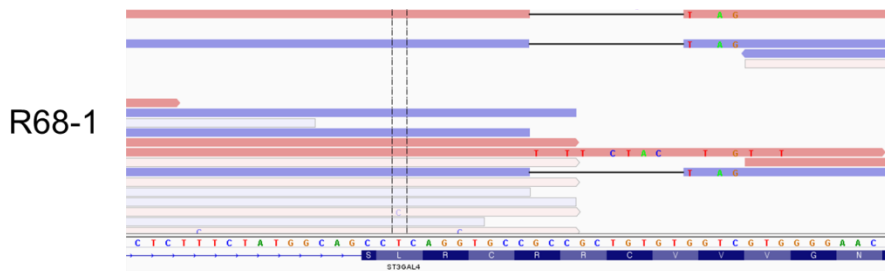

6484

hg19 GCAGCCTCAGGTGCCG**CCG**CTGTGTGGTCGTGGGGAACGGGCACCGGCTGCGGAACAGCT  
 1 GCAGCCTCAGGTGCC**TGAG**-----GTGGGGAACGGGCACCGGCTGCGGAACAGCT 10del  
 2 GCAGCCTCAGGTGCCG----- 1015del

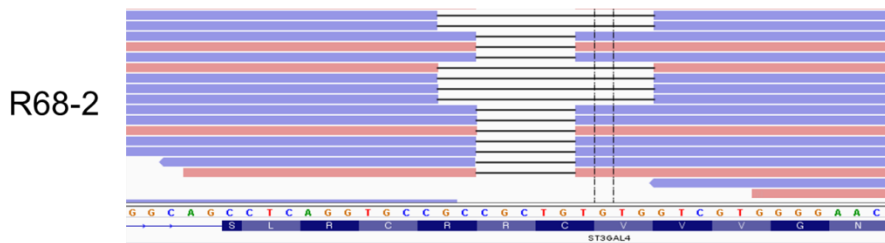

6484

hg19 GACCACTCCTCTTTCTATGGCAGCCTCAGGTGCCG**CCG**CTGTGTGGTCGTGGGGAACGGG  
 1 GACCACTCCTCTTTCTATGGCAGCCTCAGGTGCCG-----TGTGGTCGTGGGGAACGGG 5del  
 2 GACCACTCCTCTTTCTATGGCAGCCTCAGGTGCCG-----TCGTGGGGAACGGG 11del

**Supplementary Figure S3. Sequences of the sites containing sgRNA library-induced mutations in the R68-1 and R68-2 clones.** IGV was used for the analysis. The PAM sequences are indicated in red, and the insertion sequences are indicated in blue. + indicates wild type.

R68-1

**6484**

hg19 GCAGCCTCAGGTGCCG**CCG**CTGTGTGGTTCGTGGGGAACGGGCACCGGCTGCCGGAACAGCT  
 1 GCAGCCTCAGGTGCC**TGAG**-----GTGGGGAACGGGCACCGGCTGCCGGAACAGCT 10del  
 2 GCAGCCTCAGGTGCCGC----- 1015del

**1606**

hg19 GCCTTGTGAAGTCAGCACCTATGCCAAGTCTCGGAAGGA-CAT**TGG**TGTGAGTGATCTCA  
 1 GCCTTGTGAAGTCAGCACCTATGCCAAGTCTCGGAAGGA-CAT**TGG**TGTGAGTGATCTCA +  
 2 GCCTTGTGAAGTCAGCACCTATGCCAAGTCTCGGAAGGA**T**CAT**TGG**TGTGAGTGATCTCA 1 ins

**84432**

hg19 TACAGG**CCT**GTG-AGCGGGATGTCCAGTGTGGGGCAGGCACCTGCTGTGCCATCAGCCTG  
 1 TACAGG**CCT**GTG-AGCGGGATGTCCAGTGTGGGGCAGGCACCTGCTGTGCCATCAGCCTG +  
 2 TACAGG**CCT**GTG**A**AGCGGGATGTCCAGTGTGGGGCAGGCACCTGCTGTGCCATCAGCCTG 1 ins

R68-2

**6484**

hg19 GACCACTCCTCTTTCTATGGCAGCCTCAGGTGCCG**CCG**CTGTGTGGTTCGTGGGGAACGGG  
 1 GACCACTCCTCTTTCTATGGCAGCCTCAGGTGCCG-----TGTGGTTCGTGGGGAACGGG 5del  
 2 GACCACTCCTCTTTCTATGGCAGCCTCAGGTGCCG-----TCGTGGGGAACGGG 11del

**79587**

hg19 ATGAAAGAAATTATCTGAGGAATATTTTCGGTTACCCCTCAGGTACA-CCG**TGG**GTGGGA  
 1 ATGAAAGAAATTATCTGAGGAATATTTTCGGTTACCCCTCAGGTACA-CCG**TGG**GTGGGA +  
 2 ATGAAAGAAATTATCTGAGGAATATTTTCGGTTACCCCTCAGGTACA**A**CCG**TGG**GTGGGA 1 ins

**56140**

hg19 TTCCATGTGGACGTGGAGGTGAAGGATGTTAATGACAA**CCC**GCC-AGTGTTCGG  
 1 TTCCATGTGGACGTGGAGGTGAAGGATGTTAATGACAA**CCC**GCC-AGTGTTCGG +  
 2 TTCCATGTGGACGTGGAGGTGAAGGATGTTAATGACAA**CCC**GCC**A**AGTGTTCGG 1 ins

**Supplementary Figure S4. EV-D68-resistant colonies formed after transfection of sgRNAs targeting the *ST3GAL4* gene.**

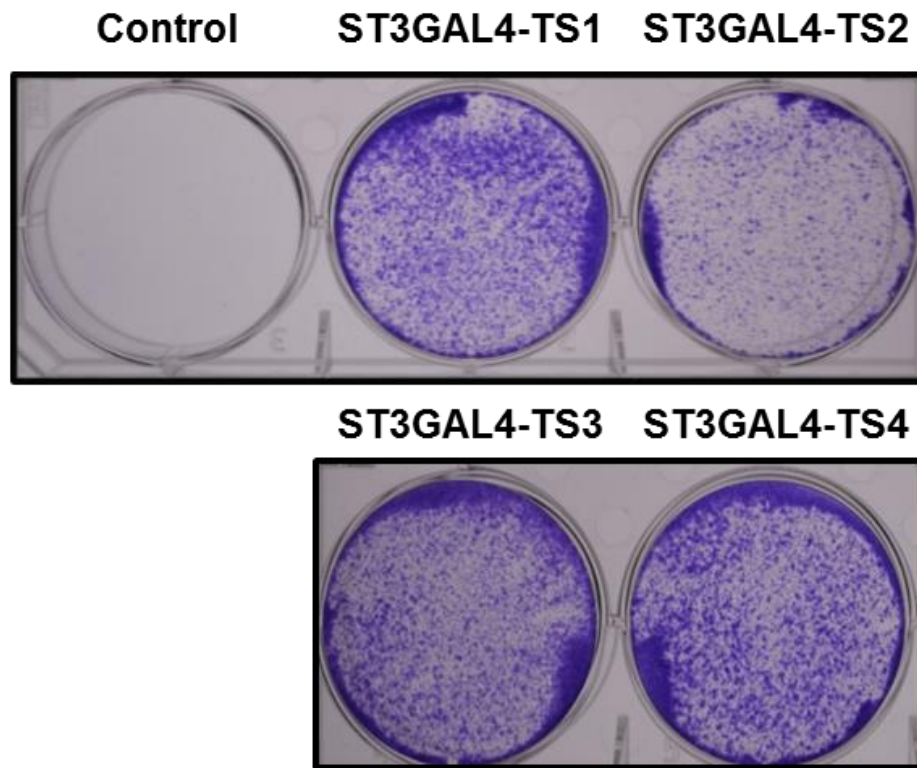

**Supplementary Figure S5. IGV view of the genes that were knocked-out in clones R68-3, 4, 5, and R68-6.** R68-3; MGAT5, chr2:135,012,121-135,012,263. R68-4, 5; COG1, chr17:71,189,364-71,189,404. R68-6; COG5, chr7:107,204,316-107,204,356. The PAM sequences are indicated in red, and the insertion sequences are indicated in blue.

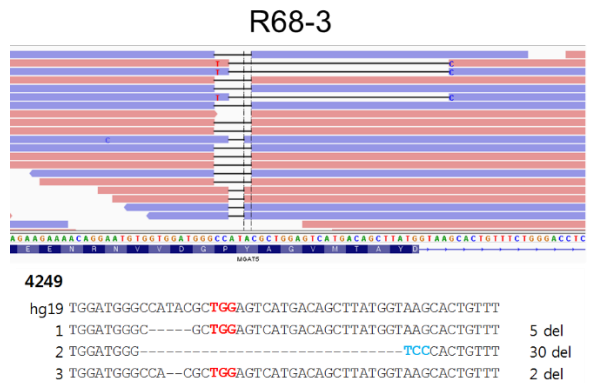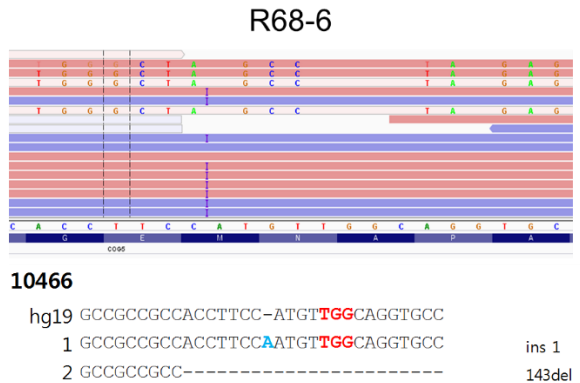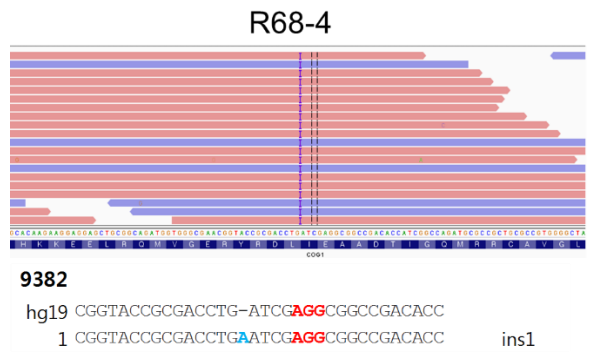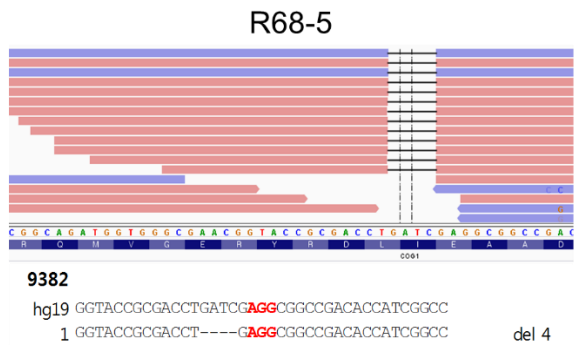

**Supplementary Figure S6. Sequences of the sites containing sgRNA library-induced mutations in the R68-3, 4, 5, and R68-6 clones.** IGV was used for the analysis. The PAM sequences are indicated in red, and the insertion sequences are indicated in blue. + indicates wild type.

**R68-3**

**4249**  
 hg19 GGGCCATACGCTGGAGTCATGACAGCTTATGGTAAGCAC  
 1 GGGC-----GCTGGAGTCATGACAGCTTATGGTAAGCAC 5 del  
 2 GGG-----TCCAC 30 del  
 3 GGGCCA--CGCTGGAGTCATGACAGCTTATGGTAAGCAC 2 del

**2525**  
 hg19 GGGTGGGGCGGTGGGAGTGGTGTCTGTCGGGAGGACC  
 1 GGGTGGGGCGGTGGGAGTGGTGTCTGTCGGGAGGACC +  
 2 -----GGGAGTGGTGTCTGTCGGGAGGACC Large del

**R68-6**

**10466**  
 hg19 GCCGCCGCCACCTTCC-ATGTGGCAGGTGCC  
 1 GCCGCCGCCACCTTCCAATGTGGCAGGTGCC ins 1  
 2 GCCGCCGCC----- 143del

**576**  
 hg19 TGGTGGCCGTGGCCTGGCACATGCGGAAGCGG  
 1 TGGTGGCCGTGGCCTGGCACATGCGGAAGCGG +  
 2 TGGTGGCCGTGGCCTGGCAC-----AAGCGG 6del

**6860**  
 hg19 CTGGCAAGCCACGG-GCTTCCTGA  
 1 CTGGCAAGCCACGG-GCTTCCTGA +  
 2 CTGGCAAGCCACGGGGCTTCCTGA ins 1

**R68-4**

**9382**  
 hg19 CGGTACCGGACCTG-ATCGAGGCGGCCGACACC  
 1 CGGTACCGGACCTGAATCGAGGCGGCCGACACC ins1

**9320**  
 hg19 TTTTGAAGCCAAGCTTGGTAGGTTTCGAGATCT  
 1 TTTTGAAGCCAAGCTTGGTAGGTTTCGAGATCT +  
 2 TTTTGAAGCCAAGCTTC--AGGTTTCGAGATCT del 2

**127665**  
 hg19 GCCCGCCCAGCAGCCCGGTAGGGA  
 1 GCCCGCCCAGCAGCCCGGTAGGGA +  
 2 GCCCGCCCAG---TCCCTGTAGGGA del 4

**201232**  
 hg19 TCGCCTCCATAGGAA-TCGCGGTGCAGCA  
 1 TCGCCTCCATAGGAA-TCGCGGTGCAGCA +  
 2 TCGCCTCCATAGGAAATCGCGGTGCAGCA ins 1  
 3 TCGCCTCCATAGGAAATCGCGGTGCAGCA ins 1

**57514**  
 hg19 GGCCTGAACATCTCCGAGCCCTTTGCGGTATCTGTG  
 1 GGCCTGAACATCTCCGAGCCCTTTGCGGTATCTGTG +  
 2 GGCCTG-----TATCTGTG del 22  
 3 GGCCTGAACATCTCCGAACTACTCCACCGGTATCTGTG ins 8, del 8

**7150**  
 hg19 AAGATAGAGCCTCCTGGACTTTT-CCGTGGCCGCGG  
 1 AAGATAGAGCCTCCTGGACTTTT-CCGTGGCCGCGG +  
 2 AAGATAGAGCCTCCTGGACTTTTCCGTGGCCGCGG ins 1

**R68-5**

**9382**  
 hg19 GGTACCGGACCTGATCGAGGCGGCCGACACCATCGGCC  
 1 GGTACCGGACCT---GAGGCGGCCGACACCATCGGCC del 4

**84699**  
 hg19 CAGGACGGCATCCTGAGACACGTGGAGCTGGGCGAGGG  
 1 CAGGACGGCATCCTGAGACACGTGGAGCTGGGCGAGGG +  
 2 CAGGACGG-----CGTGGAGCTGGGCGAGGG del 12

**2175**  
 hg19 CTGGAGCCGTGC-AGATCTGTCCCACGCTA  
 1 CTGGAGCCGTGC-AGATCTGTCCCACGCTA +  
 2 CTGGAGCCGTGCAAGATCTGTCCCACGCTA ins 1

**553115**  
 hg19 GGAGATATAGCCAATG-TGATCTGAGTCCACCG  
 1 GGAGATATAGCCAATG-TGATCTGAGTCCACCG +  
 2 GGAGATATAGCCAATGTTGATCTGAGTCCACCG ins 1

**7084**  
 hg19 GGCTGCCTTTGATGAGCCACTCCTCATGGAGATGGTGAA  
 1 GGCTGCCTTTGATGAGCCACTCCTCATGGAGATGGTGAA +  
 2 GGCT-----GGTGAA del 29
